# Supplementary material
Source: publisher site journal article supplement (https://www.dovepress.com/article/613135)
Supplement: Supplementary file 1 [file 613135_Revised%20Supplemental%20materials_1.docx]

Appendix S1 The detailed search strategy

| Search number | Query |
| --- | --- |
| 43 | (((((((((((((shoulder pain) OR (rotator cuff)) OR (subacromial imping*)) OR (shoulder imping*)) OR (frozen shoulder)) OR (adhesive capsulitis)) OR (bursitis)) OR (bicipital tendinitis)) OR (osteoarthritis shoulder)) OR (labral tear)) OR (shoulder sprain)) OR (shoulder injur*)) AND (brain)) AND (((((((((((((((((((((((((((brain imaging) OR (electroencephalogra*)) OR (electrophysiolog*)) OR (EEG)) OR (magnetoencephalogra*)) OR (MEG)) OR (positron emission tomography)) OR (PET)) OR (CT scan)) OR (computed tomography)) OR (computerised axial tomography)) OR (computerized axial tomography)) OR (functional near infrared spectroscopy)) OR (fNIRS)) OR (functional magnetic resonance imaging)) OR (fMRI)) OR (magnetic resonance imaging)) OR (MRI)) OR (diffusion tensor imaging)) OR (DTI)) OR (diffusion kurtosis imaging)) OR (DKI)) OR (magnetization transfer ratio)) OR (surface-based morphometry)) OR (SBM)) OR (voxel-based morphometry)) OR (VBM)) |
| 42 | ((((((((((((((((((((((((((brain imaging) OR (electroencephalogra*)) OR (electrophysiolog*)) OR (EEG)) OR (magnetoencephalogra*)) OR (MEG)) OR (positron emission tomography)) OR (PET)) OR (CT scan)) OR (computed tomography)) OR (computerised axial tomography)) OR (computerized axial tomography)) OR (functional near infrared spectroscopy)) OR (fNIRS)) OR (functional magnetic resonance imaging)) OR (fMRI)) OR (magnetic resonance imaging)) OR (MRI)) OR (diffusion tensor imaging)) OR (DTI)) OR (diffusion kurtosis imaging)) OR (DKI)) OR (magnetization transfer ratio)) OR (surface-based morphometry)) OR (SBM)) OR (voxel-based morphometry)) OR (VBM) |
| 41 | VBM |
| 40 | voxel-based morphometry |
| 39 | SBM |
| 38 | surface-based morphometry |
| 37 | magnetization transfer ratio |
| 36 | DKI |
| 35 | diffusion kurtosis imaging |
| 34 | DTI |
| 33 | diffusion tensor imaging |
| 32 | MRI |
| 31 | magnetic resonance imaging |
| 30 | fMRI |
| 29 | functional magnetic resonance imaging |
| 28 | fNIRS |
| 27 | functional near infrared spectroscopy |
| 26 | computerized axial tomography |
| 25 | computerised axial tomography |
| 24 | computed tomography |
| 23 | CT scan |
| 22 | PET |
| 21 | positron emission tomography |
| 20 | MEG |
| 19 | magnetoencephalogra* |
| 18 | EEG |
| 17 | electrophysiolog* |
| 16 | electroencephalogra* |
| 15 | brain imaging |
| 14 | brain |
| 13 | (((((((((((shoulder pain) OR (rotator cuff)) OR (subacromial imping*)) OR (shoulder imping*)) OR (frozen shoulder)) OR (adhesive capsulitis)) OR (bursitis)) OR (bicipital tendinitis)) OR (osteoarthritis shoulder)) OR (labral tear)) OR (shoulder sprain)) OR (shoulder injur*) |
| 12 | shoulder injur* |
| 11 | shoulder sprain |
| 10 | labral tear |
| 9 | osteoarthritis shoulder |
| 8 | bicipital tendinitis |
| 7 | bursitis |
| 6 | adhesive capsulitis |
| 5 | frozen shoulder |
| 4 | shoulder imping* |
| 3 | subacromial imping* |
| 2 | rotator cuff |
| 1 | shoulder pain |

Appendix S2 Methodological characteristics of the included studies

| Study | MRI scanner | Analysis software | Structural analysis method | Functional analysis method | Covariates adjusted | Multiple comparison correction method |
| --- | --- | --- | --- | --- | --- | --- |
| Conboy et al. 202137 | 1.5 T Signa HD (General Electric, USA), 8-channel head coil | FSL, FreeSurfer (v7.1.0) | 1. Voxel-based morphometry  2. Surface-based morphometry  3. Tract-based spatial statistics | 1. Group independent components analysis followed by dual regression to obtain subject-specific motor network maps  2. Functional connectivity analysis between the motor network and the whole brain | Age, gender, dominant hand and the presence of a bilateral cuff tear | 1. TFCE + FWE correction (5000 permutations; PFWE < 0.05) for voxel-based morphometry, tract-based spatial statistics and motor network connectivity  2. Cluster-wise correction (1000 permutations; vertexwise threshold P < 0.001; cluster-wise threshold P < 0.05) for surface-based morphometry |
| Li et al. 202325 | 3 T MAGNETOM Prisma (Siemens, Germany), 64-channel phase-array head-neck coi | DPARSF, CAT12, SPM12 | Voxel-based morphometry | 1. ALFF  2. Seed-based functional connectivity (regions showing significant between-group differences in ALFF and grey matter volume as seed) | Age, gender, education years (for ALFF) | 1. FDR correction (P < 0.05) for voxel-based morphometry, ALFF and seed-based functional connectivity  2. No multiple comparison correction reported for correlation analysis |
| Li et al. 202035 | 3 T Skyra (Siemens, Germany), Standard head coil | SPM8, DPARSF | None | 1. ReHo  2. Seed-based functional connectivity (regions showing significant between-group differences in ReHo as seed) | None | 1. GRF correction (voxel-level p < 0.001, cluster-level p < 0.05) for ReHo  2. GRF correction (voxel-level p < 0.01, cluster-level p < 0.05) for seed-based functional connectivity  3. No multiple comparison correction reported for correlation analysis |
| Wei et al. 202236 | 3 T Skyra (Siemens, Germany), Standard head coil | FreeSurfer (v6.0), DPABI (v5.1) | Surface-based morphometry (priori seeds in the precentral and postcentral gyri) | Seed-based functional connectivity (priori seeds in the precentral and postcentral gyri) | None | 1. GRF correction (voxel-level p < 0.01, cluster-level p < 0.05) for seed-based functional connectivity  2. ANOVA or non-parametric tests followed by post-hoc analysis for surface-based morphometry in priori seeds in the precentral and postcentral gyri  3. No multiple comparison correction reported for correlation analysis |
| Li et al. 202426 | 3 T MAGNETOM Prisma (Siemens, Germany), 64-channel phase-array head-neck coil | DPARSF, CAT12, SPM12 | Voxel-based morphometry | 1. ReHo  2. Seed-based functional connectivity (regions showing significant between-group differences in ReHo and grey matter volume as seed) | None | 1. FDR correction (voxel-level P < 0.001, cluster-level P < 0.05) for voxel-based morphometry, ReHo and seed-based functional connectivity  2. Bonferroni correction for correlation analysis |

ALFF = amplitude of low-frequency fluctuation; ReHo = regional homogeneity; TFCE = threshold-free cluster enhancement; FWE = family wise error; GRF = gaussian random field; FDR = false discovery rate; ANOVA = analysis of variance.

Appendix S3 Results of certainty of evidence assessment using GRADE systems

| Outcome | Number of studies | Supported studies | Risk of bias | Inconsistency | Indirectness | Imprecision | Publication bias | Certainty of evidence |
| --- | --- | --- | --- | --- | --- | --- | --- | --- |
| Lower thalamus grey matter in individuals with shoulder pain compared to healthy controls | 2 | Conboy et al, 202137 and Li et al, 202325 | Not serious | Serious | Not serious | Serious | Unable to assess | Very low certainty |
| Lower grey matter volume in left amygdala and right ventromedial prefrontal cortices in individuals with shoulder pain compared to healthy controls | 1 | Li et al, 202426 | Not serious | Unable to assess | Not serious | Very serious | Unable to assess | Very low certainty |
| Lower grey matter density in the left postcentral gyrus, left anterior intra-parietal sulcus, left inferior parietal lobule, and right temporal-parietal junction in individuals with shoulder pain compared to healthy controls | 1 | Conboy et al, 202137 | Not serious | Unable to assess | Not serious | Very serious | Unable to assess | Very low certainty |
| Lower cortical thickness in the right temporal-parietal junction, right superior temporal sulcus, and right inferior temporal cortex in individuals with shoulder pain compared to healthy controls | 1 | Conboy et al, 202137 | Not serious | Unable to assess | Not serious | Very serious | Unable to assess | Very low certainty |
| No significant differences in the asymmetry index of cortical surface area and the asymmetry index of cortical thickness of the precentral and postcentral cortex between individuals with shoulder pain and healthy controls | 1 | Wei et al, 202236 | Very serious | Unable to assess | Not serious | Very serious | Unable to assess | Very low certainty |
| Lower fractional anisotropy of white matter in the bilateral inferior frontal occipital fasciculus, bilateral inferior longitudinal fasciculus, right superior longitudinal fasciculus, and right optic radiations in individuals with shoulder pain compared to healthy controls | 1 | Conboy et al, 202137 | Not serious | Unable to assess | Not serious | Very serious | Unable to assess | Very low certainty |
| Lower functional connectivity between the motor network and right middle temporal visual cortex in individuals with shoulder pain compared to healthy controls | 1 | Conboy et al, 202137 | Not serious | Unable to assess | Not serious | Very serious | Unable to assess | Very low certainty |
| Lower functional connectivity between the right orbitofrontal cortex and right rectus gyrus, and between the right orbitofrontal cortex and right superior frontal cortex in individuals with shoulder pain compared to healthy controls | 1 | Li et al, 202035 | Very serious | Unable to assess | Not serious | Very serious | Unable to assess | Very low certainty |
| Greater functional connectivity between the left postcentral gyrus and the left thalamus in individuals with shoulder pain compared to healthy controls | 1 | Li et al, 202325 | Not serious | Unable to assess | Not serious | Very serious | Unable to assess | Very low certainty |
| Greater functional connectivity in the left postcentral gyrus with right cingulate gyrus, left paracentral lobule, and right postcentral gyrus; in the right postcentral gyrus with the left caudate and left paracentral lobule; in the right precentral gyrus with the right cingulate cortex, right precuneus, and left paracentral lobule in individuals with shoulder pain compared to healthy controls | 1 | Wei et al, 202236 | Very serious | Unable to assess | Not serious | Very serious | Unable to assess | Very low certainty |
| Greater functional connectivity between the right ventromedial prefrontal cortices and right anterior cingulate cortex in individuals with shoulder pain compared to healthy controls | 1 | Li et al, 202426 | Not serious | Unable to assess | Not serious | Very serious | Unable to assess | Very low certainty |
| Directional reversal in functional connectivity between the motor network and right middle temporal visual cortex in individuals with shoulder pain (negative) compared to healthy controls (positive) | 1 | Conboy et al, 202137 | Not serious | Unable to assess | Not serious | Very serious | Unable to assess | Very low certainty |
| Lower ReHo in the right orbitofrontal cortex in individuals with shoulder pain compared to healthy controls | 1 | Li et al, 202035 | Very serious | Unable to assess | Not serious | Very serious | Unable to assess | Very low certainty |
| Lower ReHo in the right ventromedial prefrontal cortices in individuals with shoulder pain compared to healthy controls | 1 | Li et al, 202426 | Not serious | Unable to assess | Not serious | Very serious | Unable to assess | Very low certainty |
| Greater ReHo in the left middle temporal gyrus in individuals with shoulder pain compared to healthy controls | 1 | Li et al, 202035 | Very serious | Unable to assess | Not serious | Very serious | Unable to assess | Very low certainty |
| Greater ALFF in the left thalamus and bilateral anterior cingulate cortex in individuals with shoulder pain compared to healthy controls | 1 | Li et al, 202325 | Not serious | Unable to assess | Not serious | Very serious | Unable to assess | Very low certainty |
| Higher pain intensity was associated with smaller grey matter volume of bilateral thalamus in individuals with shoulder pain | 1 | Li et al, 202325 | Not serious | Unable to assess | Not serious | Very serious | Unable to assess | Very low certainty |
| Higher pain intensity was associated with a smaller asymmetry index of the cortical surface area in the precentral cortex in individuals with shoulder pain | 1 | Wei et al, 202236 | Very serious | Unable to assess | Not serious | Very serious | Unable to assess | Very low certainty |
| Higher pain intensity was associated with greater functional connectivity between right ventromedial prefrontal cortex and right anterior cingulate cortex in individuals with shoulder pain | 1 | Li et al, 202426 | Not serious | Unable to assess | Not serious | Very serious | Unable to assess | Very low certainty |
| Lower pain thresholds were related to a smaller grey matter volume of the bilateral thalamus and functional connectivity between the left thalamus and left postcentral gyrus in individuals with shoulder pain | 1 | Li et al, 202325 | Not serious | Unable to assess | Not serious | Very serious | Unable to assess | Very low certainty |
| Longer pain duration was correlated with greater grey matter volume in the ventromedial prefrontal cortices in individuals with shoulder pain | 1 | Li et al, 202426 | Not serious | Unable to assess | Not serious | Very serious | Unable to assess | Very low certainty |
| Poorer shoulder function was correlated with a smaller asymmetry index of the cortical surface area in the precentral and postcentral cortex, and lower functional connectivity between the right precentral gyrus and right cingulate gyrus in individuals with shoulder pain | 1 | Wei et al, 202236 | Very serious | Unable to assess | Not serious | Very serious | Unable to assess | Very low certainty |
| More severe depressive symptoms were associated with greater grey matter volume in the ventromedial prefrontal cortices in individuals with shoulder pain | 1 | Li et al, 202426 | Not serious | Unable to assess | Not serious | Very serious | Unable to assess | Very low certainty |
| More severe pain vigilance and awareness was correlated with greater ALFF within the anterior cingulate cortex in individuals with shoulder pain | 1 | Li et al, 202325 | Not serious | Unable to assess | Not serious | Very serious | Unable to assess | Very low certainty |

Footnotes:

1. GRADE = grading of recommendations, assessment, development, and evaluations; ALFF = amplitude of low-frequency fluctuation; ReHo = regional homogeneity.
2. All outcomes were rated as starting at low certainty because all included studies used a cross-sectional design.
3. Substantial methodological heterogeneity was present across the included studies, including differences in neuroimaging analysis methods (voxel-based morphometry, surface-based morphometry, diffusion tensor imaging, and resting-state fMRI metrics such as functional connectivity, ReHo, and ALFF). For the outcome of lower thalamus grey matter, inconsistency was rated as serious because one study measured grey matter volume (Li et al, 202325) while the other measured grey matter density (Conboy et al, 202137). For other outcomes, inconsistency was rated as unable to assess because outcomes were supported by only a single study.
4. All outcomes were downgraded due to imprecision (small sample sizes and limited number of studies).
5. All outcomes were rated as unable to assess in publication bias domain because of the limited number of studies.
6. Potential overlap in the samples exists between Li et al. 202035 and Wei et al. 202236. However, this potential sample overlap did not lead to additional downgrading in the GRADE assessment. Most outcomes were supported by a single study. The only outcome supported by two studies (lower thalamus grey matter) was derived from Li et al. 202325 and Conboy et al. 202137, neither of which involved the overlapping cohorts.
